# Supplementary material for: Circulation-regulated impacts of aerosol pollution on urban heat island in Beijing
Source: Copernicus journal article supplement (doi:10.5194/egusphere-2022-77), 2022-04-04
Supplement: Supplementary file 1 [file egusphere-2022-77-supplement.pdf]

*Supplement of*

**Circulation regulated impacts of aerosol pollution on urban heat  
island in Beijing**

**Fan Wang et al.**

Correspondence to: Meng Gao ([mmgao2@hkbu.edu.hk](mailto:mmgao2@hkbu.edu.hk))

**Contents:**

Tables S1–S2

Figures S1–S6

**Table S1.** Basic information of automatic weather stations in Beijing.

| Station ID | Station Name | Longitude (°E) | Latitude (°N) |
|------------|--------------|----------------|---------------|
| 54399      | Haidian      | 116.2906       | 39.9869       |
| 54406      | Yanqing      | 115.9689       | 40.4494       |
| 54419      | Huairou      | 116.6272       | 40.3575       |
| 54421      | Shangdianzi  | 117.1117       | 40.6589       |
| 54424      | Pinggu       | 117.1178       | 40.1694       |
| 54511      | Guanxiangtai | 116.4694       | 39.8061       |
| 54597      | Xiayunling   | 115.7403       | 39.7289       |

**Table S2.** Basic information of CNEMC stations in Beijing.

| Station ID | Station Name   | Longitude (°E) | Latitude (°N) |
|------------|----------------|----------------|---------------|
| 1001A      | Wanshouxigong  | 116.366        | 39.8673       |
| 1002A      | Dingling       | 116.17         | 40.2865       |
| 1003A      | Dongsi         | 116.434        | 39.9522       |
| 1004A      | Tiantan        | 116.434        | 39.8745       |
| 1005A      | Nongzhanguan   | 116.473        | 39.9716       |
| 1006A      | Guanyuan       | 116.361        | 39.9425       |
| 1007A      | Wanliu         | 116.315        | 39.9934       |
| 1008A      | Shunyixincheng | 116.72         | 40.1438       |
| 1009A      | Huairou        | 116.644        | 40.3937       |
| 1010A      | Changping      | 116.23         | 40.1952       |
| 1011A      | Aotizhongxin   | 116.407        | 40.0031       |
| 1012A      | Gucheng        | 116.225        | 39.9279       |

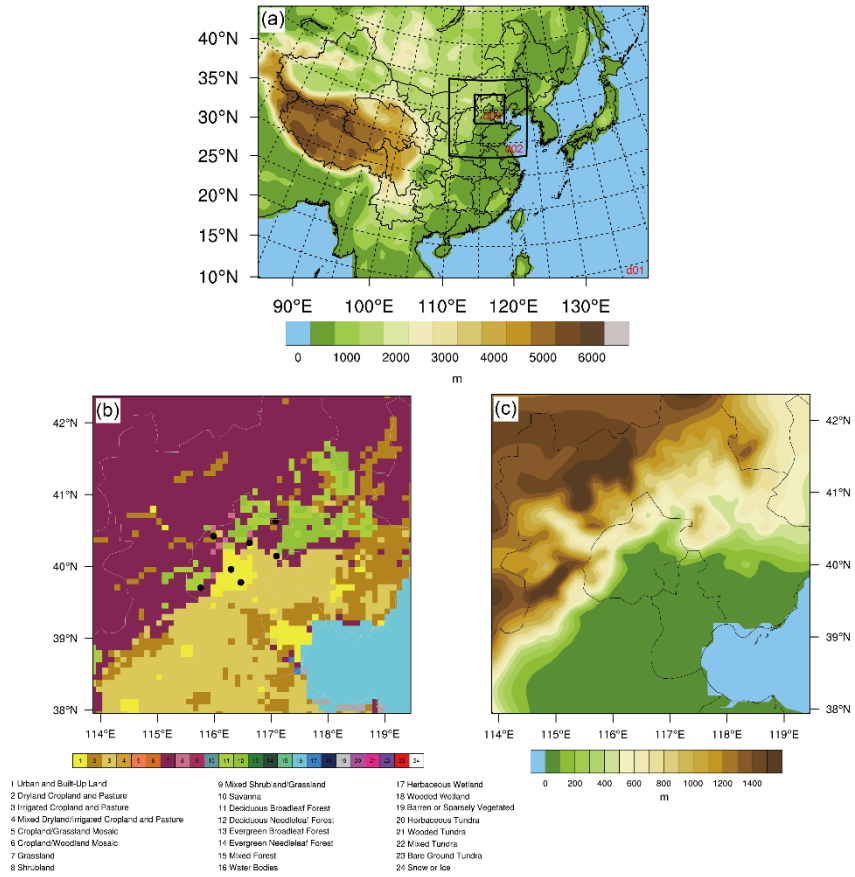

**Figure S1.** WRF-Chem domain configuration with terrain height (a), land use categories of the innermost domain (b) and terrain height of the innermost domain (c). (Black dots in b represent locations of automatic weather stations.)

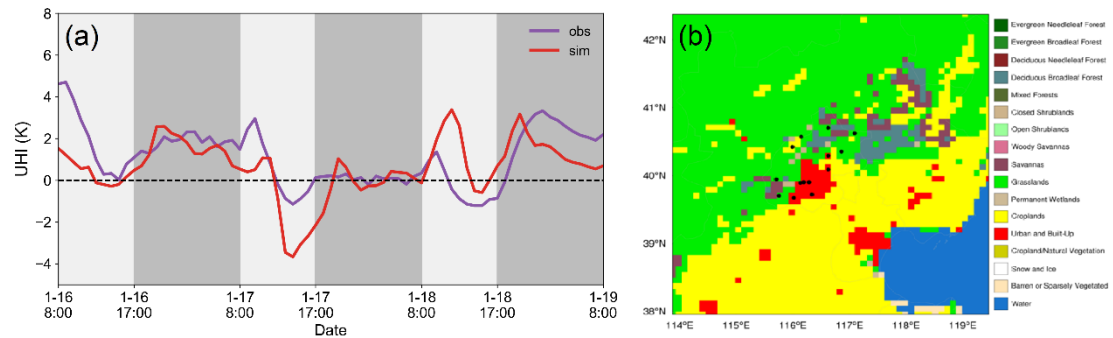

**Figure S2.** Simulated and observed UHII in Beijing (a) and the locations of the used sites (b).

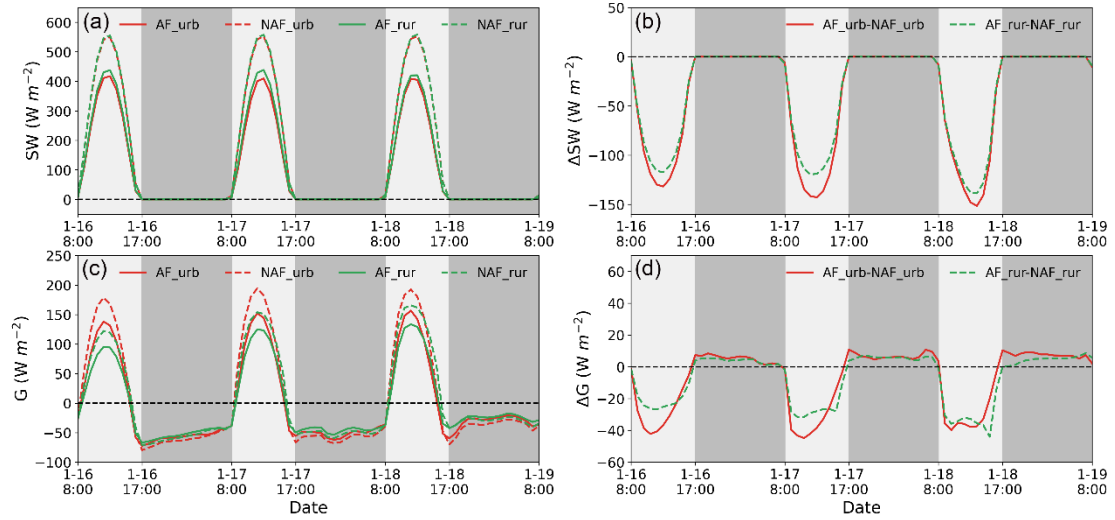

**Figure S3.** Variations of (a) downward shortwave radiation, (b) difference of downward shortwave radiation between AF and NAF, (c) heat storage and (d) difference in heat storage between AF and NAF in urban and rural areas.

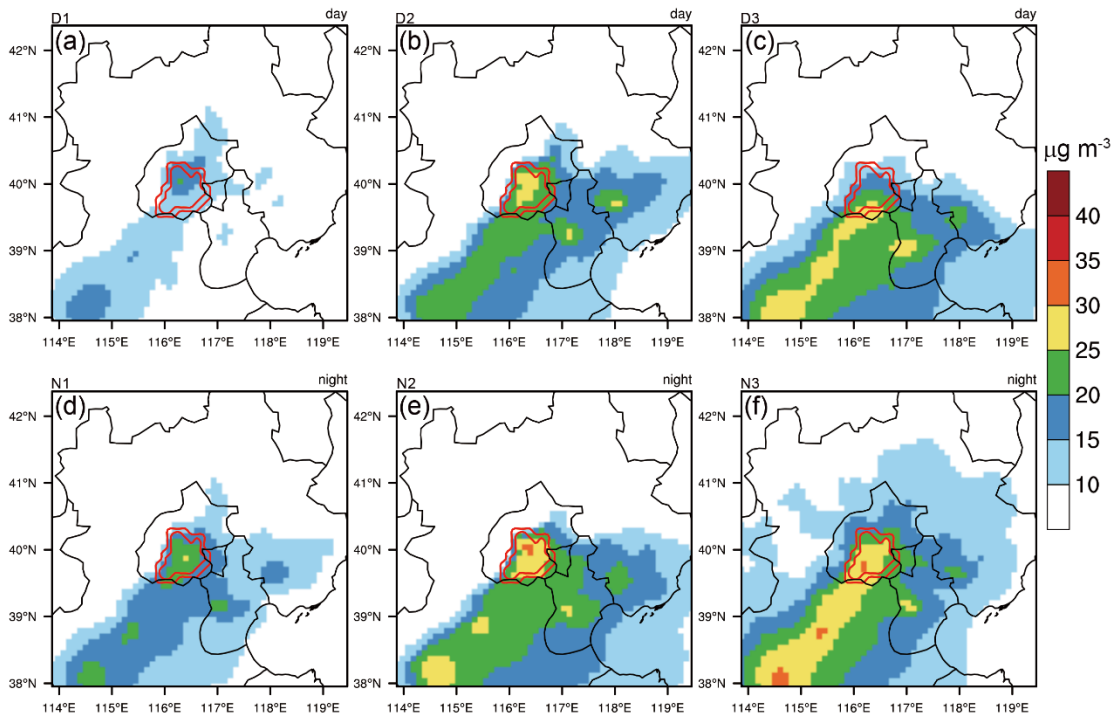

**Figure S4.** Simulated black carbon concentration on (a) D1, (b) D2, (c) D3, (d) N1, (e) N2 and (f) N3. The areas within the inner red line are urban areas. The areas between the two red lines are rural areas having the same size as the urban areas.

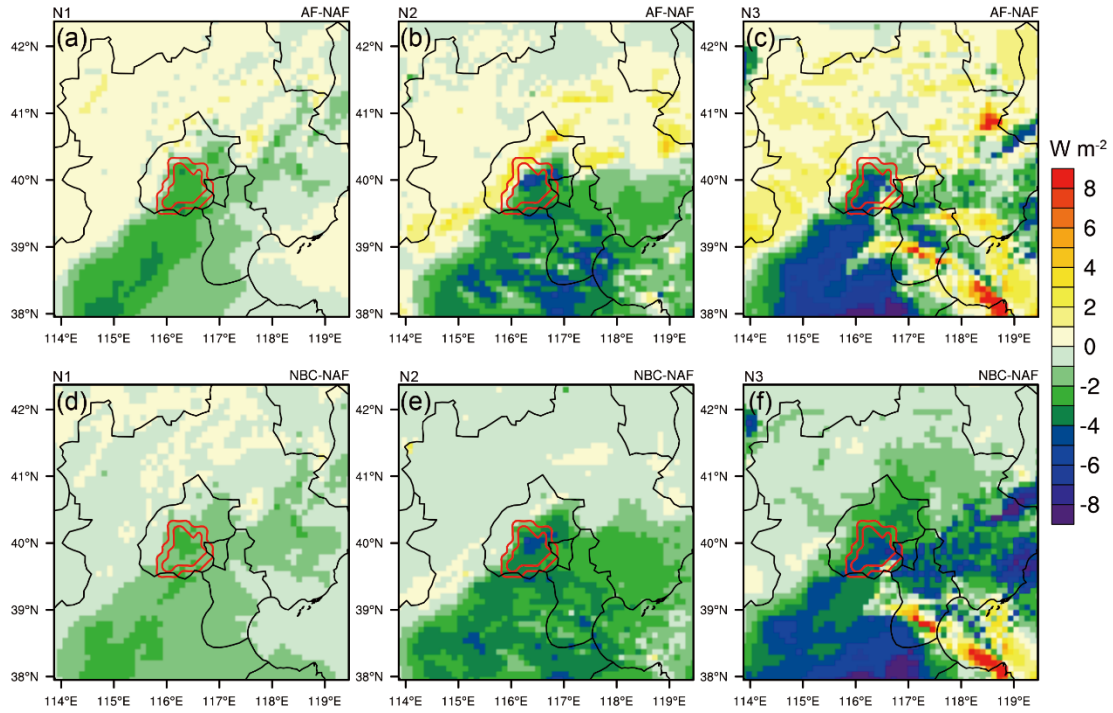

**Figure S5.** Simulated difference in downward longwave radiation between AF and NAF (first row), NBC and NAF (second row) at nighttime. The areas within the inner red line are urban areas. The areas between the two red lines are rural areas having the same size as the urban areas.

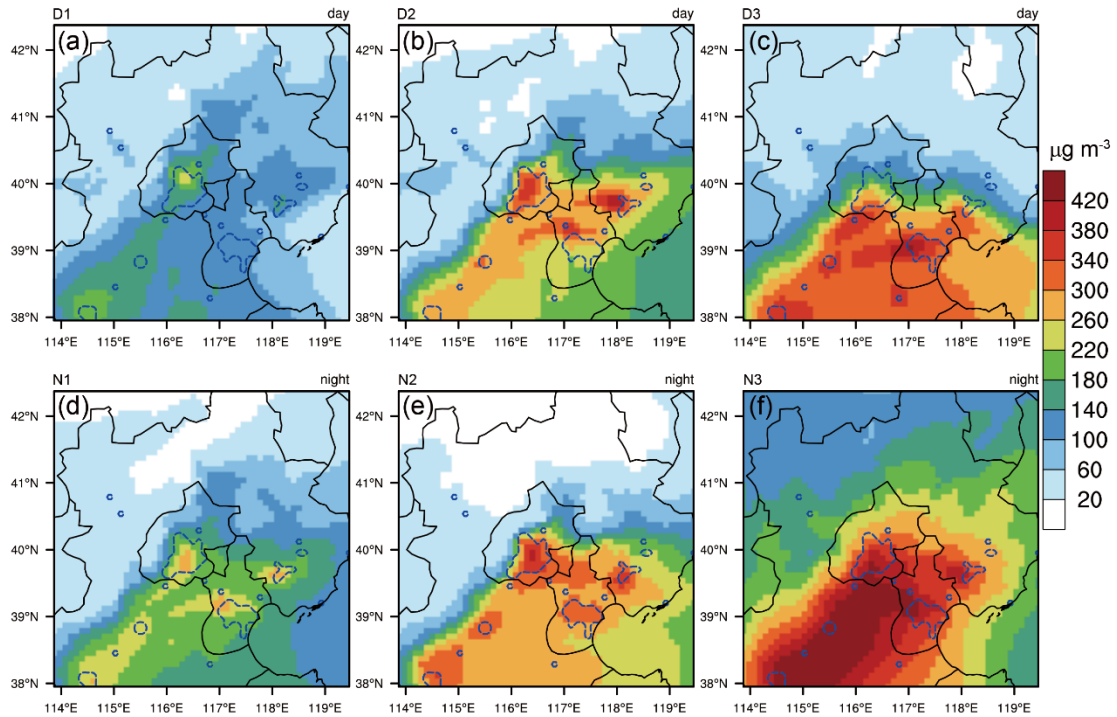

**Figure S6.** Simulated  $PM_{2.5}$  concentration on (a) D1, (b) D2, (c) D3, (d) N1, (e) N2 and (f) N3.
